# Supplementary material for: Genomic Characterisation of Vinegar Hill Virus, An Australian Nairovirus Isolated in 1983 from Argas Robertsi Ticks Collected from Cattle Egrets
Source: MDPI journal article supplement (doi:10.3390/v9120373), 2017-12-05
Supplement: s1 [file s1]

S2 Table. Amino acid sequence identities (%) of nairovirus N proteins determined by p-distance estimation in MEGA7.

|       | VINH | DGKV | AHV  | TUNV | AMV  | SAPV | CCHFV | GANV  | NSDV | KUPV | DUGV | HAZV | TFLV | FARV | HUGV | RAZAV | PSV  | ZIRV | GRSV | SOLV | WTV  | TTV1 | HTV1 | GOSV | IKV  | KTRV | KKOV | LPHV | YOGV | QYBV | BDAV | AVAV | CMV  | TILL | SAKV | TAGV | TFAV |  |
|-------|------|------|------|------|------|------|-------|-------|------|------|------|------|------|------|------|-------|------|------|------|------|------|------|------|------|------|------|------|------|------|------|------|------|------|------|------|------|------|--|
| DGKV  | 72.0 |      |      |      |      |      |       |       |      |      |      |      |      |      |      |       |      |      |      |      |      |      |      |      |      |      |      |      |      |      |      |      |      |      |      |      |      |  |
| AHV   | 62.1 | 59.3 |      |      |      |      |       |       |      |      |      |      |      |      |      |       |      |      |      |      |      |      |      |      |      |      |      |      |      |      |      |      |      |      |      |      |      |  |
| TUNV  | 62.1 | 59.9 | 95.4 |      |      |      |       |       |      |      |      |      |      |      |      |       |      |      |      |      |      |      |      |      |      |      |      |      |      |      |      |      |      |      |      |      |      |  |
| AMV   | 60.6 | 63.4 | 76.0 | 75.8 |      |      |       |       |      |      |      |      |      |      |      |       |      |      |      |      |      |      |      |      |      |      |      |      |      |      |      |      |      |      |      |      |      |  |
| SAPV  | 54.4 | 52.9 | 52.4 | 52.4 | 52.4 |      |       |       |      |      |      |      |      |      |      |       |      |      |      |      |      |      |      |      |      |      |      |      |      |      |      |      |      |      |      |      |      |  |
| CCHFV | 35.2 | 35.0 | 35.9 | 36.3 | 37.0 | 35.5 |       |       |      |      |      |      |      |      |      |       |      |      |      |      |      |      |      |      |      |      |      |      |      |      |      |      |      |      |      |      |      |  |
| GANV  | 36.6 | 35.5 | 34.8 | 35.7 | 35.5 | 31.7 | 61.9  |       |      |      |      |      |      |      |      |       |      |      |      |      |      |      |      |      |      |      |      |      |      |      |      |      |      |      |      |      |      |  |
| NSDV  | 36.6 | 35.5 | 34.8 | 35.7 | 35.5 | 31.7 | 61.9  | 100.0 |      |      |      |      |      |      |      |       |      |      |      |      |      |      |      |      |      |      |      |      |      |      |      |      |      |      |      |      |      |  |
| KUPV  | 35.2 | 34.6 | 34.1 | 33.7 | 36.3 | 32.4 | 58.1  | 63.2  | 63.2 |      |      |      |      |      |      |       |      |      |      |      |      |      |      |      |      |      |      |      |      |      |      |      |      |      |      |      |      |  |
| DUGV  | 35.0 | 33.9 | 32.6 | 33.5 | 33.7 | 31.5 | 56.8  | 61.0  | 61.0 | 75.6 |      |      |      |      |      |       |      |      |      |      |      |      |      |      |      |      |      |      |      |      |      |      |      |      |      |      |      |  |
| HAZV  | 36.6 | 34.4 | 37.9 | 37.7 | 35.7 | 34.8 | 60.8  | 63.2  | 63.2 | 57.9 | 56.2 |      |      |      |      |       |      |      |      |      |      |      |      |      |      |      |      |      |      |      |      |      |      |      |      |      |      |  |
| TFLV  | 35.7 | 33.7 | 36.1 | 35.9 | 35.0 | 32.8 | 59.3  | 62.1  | 62.1 | 55.5 | 54.8 | 76.0 |      |      |      |       |      |      |      |      |      |      |      |      |      |      |      |      |      |      |      |      |      |      |      |      |      |  |
| FARV  | 42.1 | 43.6 | 44.3 | 44.3 | 43.0 | 41.0 | 31.5  | 31.1  | 31.1 | 31.3 | 30.6 | 32.2 | 30.8 |      |      |       |      |      |      |      |      |      |      |      |      |      |      |      |      |      |      |      |      |      |      |      |      |  |
| HUGV  | 41.9 | 43.4 | 44.3 | 44.3 | 43.2 | 41.0 | 31.3  | 31.5  | 31.5 | 31.5 | 30.8 | 32.2 | 30.8 | 99.1 |      |       |      |      |      |      |      |      |      |      |      |      |      |      |      |      |      |      |      |      |      |      |      |  |
| RAZAV | 41.4 | 42.7 | 43.2 | 43.2 | 43.4 | 41.0 | 32.6  | 32.6  | 32.6 | 32.6 | 32.2 | 33.0 | 32.4 | 82.2 | 81.5 |       |      |      |      |      |      |      |      |      |      |      |      |      |      |      |      |      |      |      |      |      |      |  |
| PSV   | 41.4 | 42.7 | 44.1 | 43.6 | 42.7 | 39.2 | 32.2  | 31.7  | 31.7 | 32.8 | 31.5 | 33.3 | 31.7 | 85.7 | 85.0 | 83.0  |      |      |      |      |      |      |      |      |      |      |      |      |      |      |      |      |      |      |      |      |      |  |
| ZIRV  | 41.6 | 44.5 | 43.6 | 43.6 | 43.8 | 40.3 | 32.2  | 31.7  | 31.7 | 32.8 | 31.9 | 32.8 | 31.1 | 76.7 | 76.7 | 72.7  | 73.6 |      |      |      |      |      |      |      |      |      |      |      |      |      |      |      |      |      |      |      |      |  |
| GRSV  | 41.2 | 42.1 | 42.1 | 41.6 | 41.9 | 40.7 | 31.1  | 31.1  | 31.1 | 33.0 | 31.9 | 30.2 | 31.1 | 59.3 | 59.3 | 58.1  | 57.0 | 60.6 |      |      |      |      |      |      |      |      |      |      |      |      |      |      |      |      |      |      |      |  |
| SOLV  | 42.1 | 40.3 | 42.7 | 42.7 | 41.2 | 41.2 | 31.3  | 32.4  | 32.4 | 32.8 | 32.8 | 32.2 | 31.3 | 60.8 | 61.0 | 58.8  | 59.0 | 59.7 | 80.6 |      |      |      |      |      |      |      |      |      |      |      |      |      |      |      |      |      |      |  |
| WTV   | 32.6 | 30.6 | 32.8 | 32.4 | 31.5 | 31.5 | 34.8  | 33.9  | 33.9 | 31.3 | 33.5 | 34.8 | 34.4 | 31.7 | 31.5 | 31.9  | 31.9 | 31.5 | 31.9 | 31.5 |      |      |      |      |      |      |      |      |      |      |      |      |      |      |      |      |      |  |
| TTV1  | 32.4 | 32.2 | 33.9 | 33.5 | 34.1 | 32.8 | 34.6  | 36.6  | 36.6 | 34.4 | 32.8 | 36.3 | 34.8 | 30.8 | 31.1 | 32.2  | 31.9 | 31.1 | 33.0 | 31.5 | 50.9 |      |      |      |      |      |      |      |      |      |      |      |      |      |      |      |      |  |
| HTV1  | 33.5 | 32.8 | 31.9 | 31.5 | 33.0 | 33.5 | 35.2  | 34.8  | 34.8 | 35.0 | 34.4 | 34.1 | 32.2 | 30.2 | 30.0 | 29.5  | 29.7 | 30.8 | 31.3 | 30.6 | 48.2 | 52.2 |      |      |      |      |      |      |      |      |      |      |      |      |      |      |      |  |
| GOSV  | 34.4 | 36.6 | 35.5 | 34.8 | 35.5 | 35.2 | 34.6  | 34.8  | 34.8 | 33.0 | 32.6 | 33.9 | 31.9 | 33.0 | 32.8 | 32.4  | 33.7 | 32.6 | 28.0 | 30.0 | 30.6 | 34.1 | 31.9 |      |      |      |      |      |      |      |      |      |      |      |      |      |      |  |
| IKV   | 34.1 | 34.1 | 35.5 | 34.1 | 35.2 | 36.3 | 35.2  | 35.7  | 35.7 | 35.2 | 33.5 | 34.6 | 33.7 | 32.8 | 33.0 | 33.7  | 33.3 | 33.3 | 30.4 | 31.9 | 31.1 | 33.3 | 29.3 | 63.7 |      |      |      |      |      |      |      |      |      |      |      |      |      |  |
| KTRV  | 33.5 | 34.8 | 35.2 | 34.6 | 35.7 | 35.2 | 36.3  | 35.0  | 35.0 | 33.3 | 32.4 | 34.1 | 34.1 | 32.6 | 32.6 | 33.0  | 33.7 | 33.0 | 29.3 | 30.8 | 30.8 | 32.8 | 30.2 | 66.7 | 86.8 |      |      |      |      |      |      |      |      |      |      |      |      |  |
| KKOV  | 38.1 | 38.3 | 37.2 | 35.7 | 37.4 | 38.8 | 37.7  | 37.4  | 37.4 | 37.0 | 38.1 | 36.1 | 36.6 | 32.2 | 32.2 | 31.7  | 31.5 | 32.2 | 32.4 | 33.0 | 33.7 | 34.6 | 35.0 | 46.5 | 47.1 | 47.8 |      |      |      |      |      |      |      |      |      |      |      |  |
| LPHV  | 36.8 | 37.7 | 37.2 | 35.7 | 36.3 | 38.8 | 38.1  | 37.4  | 37.4 | 37.7 | 37.9 | 35.9 | 36.8 | 32.4 | 32.4 | 32.2  | 31.9 | 31.9 | 32.2 | 32.6 | 33.7 | 34.8 | 35.0 | 47.6 | 46.5 | 47.4 | 91.6 |      |      |      |      |      |      |      |      |      |      |  |
| YOGV  | 38.3 | 39.9 | 38.1 | 37.0 | 38.5 | 38.8 | 37.0  | 37.4  | 37.4 | 37.7 | 36.8 | 34.4 | 34.4 | 32.8 | 33.0 | 31.9  | 32.4 | 32.2 | 32.8 | 33.0 | 35.0 | 34.8 | 35.2 | 47.8 | 48.0 | 47.6 | 80.6 | 80.0 |      |      |      |      |      |      |      |      |      |  |
| QYBV  | 35.2 | 36.1 | 33.5 | 32.6 | 35.5 | 36.1 | 37.2  | 38.3  | 38.3 | 35.7 | 36.8 | 36.1 | 36.1 | 30.4 | 30.6 | 31.3  | 30.4 | 30.4 | 29.7 | 29.7 | 35.0 | 33.7 | 33.7 | 41.9 | 42.1 | 40.3 | 50.9 | 51.5 | 51.8 | 72.9 |      |      |      |      |      |      |      |  |
| BDAV  | 35.5 | 36.1 | 32.8 | 32.2 | 35.7 | 37.7 | 37.7  | 36.1  | 36.1 | 34.6 | 36.3 | 34.1 | 35.9 | 30.2 | 30.2 | 32.4  | 31.5 | 30.6 | 29.3 | 29.7 | 34.6 | 34.4 | 32.6 | 43.6 | 42.1 | 42.1 | 50.9 | 51.5 | 51.8 | 72.9 |      |      |      |      |      |      |      |  |
| AVAV  | 35.2 | 34.4 | 37.7 | 36.6 | 36.1 | 35.2 | 43.2  | 41.0  | 41.0 | 41.4 | 43.0 | 44.3 | 42.1 | 32.6 | 32.4 | 33.9  | 33.0 | 34.6 | 31.7 | 31.7 | 35.5 | 37.4 | 37.4 | 37.9 | 38.3 | 39.0 | 42.7 | 43.2 | 39.4 | 37.7 | 37.7 |      |      |      |      |      |      |  |
| CMV   | 33.5 | 33.0 | 33.5 | 33.7 | 33.3 | 33.7 | 43.0  | 42.5  | 42.5 | 41.4 | 41.6 | 42.5 | 43.8 | 30.6 | 30.6 | 32.4  | 31.7 | 31.3 | 31.1 | 31.7 | 34.1 | 35.5 | 38.1 | 37.7 | 38.1 | 37.0 | 38.1 | 39.0 | 36.6 | 38.1 | 37.4 | 64.8 |      |      |      |      |      |  |
| TILL  | 31.9 | 32.6 | 32.8 | 32.2 | 33.5 | 32.8 | 42.3  | 42.5  | 42.5 | 41.2 | 41.4 | 43.0 | 43.4 | 30.4 | 30.6 | 33.0  | 31.7 | 32.2 | 30.4 | 30.6 | 34.1 | 35.2 | 37.4 | 35.9 | 37.9 | 36.6 | 37.7 | 39.2 | 36.1 | 37.2 | 36.3 | 64.3 | 84.1 |      |      |      |      |  |
| SAKV  | 31.7 | 32.6 | 32.6 | 31.9 | 33.3 | 32.4 | 42.3  | 42.1  | 42.1 | 41.0 | 41.2 | 43.0 | 43.4 | 30.8 | 31.1 | 33.0  | 32.2 | 32.6 | 30.2 | 30.8 | 33.7 | 34.8 | 37.7 | 35.9 | 37.4 | 36.1 | 37.4 | 39.0 | 35.9 | 36.8 | 36.3 | 63.7 | 84.1 | 98.9 |      |      |      |  |
| TAGV  | 32.8 | 32.6 | 34.4 | 33.3 | 32.6 | 33.5 | 43.8  | 43.0  | 43.0 | 42.3 | 42.3 | 43.2 | 43.2 | 30.4 | 30.4 | 33.3  | 31.7 | 31.9 | 30.4 | 30.0 | 35.9 | 35.7 | 38.5 | 35.5 | 37.4 | 36.1 | 35.7 | 36.8 | 34.6 | 36.3 | 37.2 | 64.8 | 78.4 | 80.0 | 79.3 |      |      |  |
| TFAV  | 32.2 | 30.2 | 33.3 | 33.3 | 33.3 | 32.8 | 44.5  | 44.7  | 44.7 | 43.6 | 44.1 | 42.3 | 44.3 | 31.1 | 31.1 | 32.2  | 31.7 | 32.4 | 31.3 | 33.0 | 30.0 | 32.6 | 34.4 | 32.6 | 33.0 | 32.6 | 37.0 | 37.4 | 37.2 | 33.0 | 34.4 | 38.5 | 39.4 | 38.8 | 38.5 | 39.2 |      |  |
| ERVV  | 32.4 | 31.3 | 32.6 | 31.5 | 31.7 | 29.5 | 44.1  | 43.0  | 43.0 | 42.3 | 44.1 | 41.6 | 44.3 | 31.1 | 31.1 | 32.8  | 31.7 | 32.6 | 30.4 | 32.6 | 30.6 | 31.9 | 33.7 | 31.9 | 34.8 | 33.5 | 32.6 | 33.3 | 32.2 | 30.8 | 30.8 | 37.7 | 38.3 | 38.1 | 37.9 | 40.3 | 70.3 |  |
