# Supplementary material for: Genomic Characterisation of Vinegar Hill Virus, An Australian Nairovirus Isolated in 1983 from Argas Robertsi Ticks Collected from Cattle Egrets
Source: MDPI journal article supplement (doi:10.3390/v9120373), 2017-12-05
Supplement: s1 [file s1]

S1 Table: Viruses and GenBank accession numbers of sequences used in phylogenetic and other comparative analyses

| Abbreviation | Name                             | GenBank accession number |           |           |
|--------------|----------------------------------|--------------------------|-----------|-----------|
|              |                                  | L seq                    | M seq     | S seq     |
| AHV          | Abu Hammad virus                 | KU925434                 | KU925435  | KU925436  |
| AMV          | Abu Mina virus                   | KU925437                 | KU925438  | KU925439  |
| AVAV         | Avalon virus                     | KU925440                 | KU9255441 | KU925442  |
| BDAV         | Bandia virus                     | KU925446                 | KU9255447 | KU925448  |
| CMV          | Clo Mor virus                    | KU343139                 | KU343140  | KU343141  |
| CCHFV        | Crimean Congo haemorrhagic virus | NC_005301                | NC_005300 | NC_005302 |
| DGKV         | Dera Ghazi Khan virus            | KU925452                 | KU925453  | KU925454  |
| DUGV         | Dugbe virus                      | NC_004159                | NC_004158 | NC_004157 |
| ERVV         | Erve virus                       | JF911697                 | JF911698  | JF911699  |
| FARV         | Farallon virus                   | KU925461                 | KU925462  | KU925463  |
| GANV         | Ganjam virus                     | KU925464                 | KU925465  | KU925466  |
| GOSV         | Gossas virus                     | KR534878                 | KR534877  | KR534876  |
| GRSV         | Great Saltee virus               | KU925467                 | KU925468  | KU925469  |
| HAZV         | Hazara virus                     | KP406723                 | KP406724  | KP406725  |
| HTV1         | Huangpi tick virus I             | KM817667                 | KM817706  | KM817734  |
| HUGV         | Hughes virus                     | KU925470                 | KU925471  | KU925472  |
| IKV          | Issyk-Kul virus                  | KR537441                 | KR537442  | KR537443  |
| KKOV         | Kasokero virus                   | KR537444                 | KR537445  | KR537446  |
| KTRV         | Keterrah virus                   | KR537447                 | KR537448  | KR537449  |
| KUPV         | Kupe virus                       | EU257628                 | EU257627  | EU257626  |
| LPHV         | Leopard's Hill virus             | NC_025831                | NC_025832 | NC_025833 |
| NSDV         | Nairobi sheep disease virus      | EU697949                 | EU697950  | AF504294  |
| PSV          | Punta salinas virus              | KU925473                 | KU925474  | KU925475  |
| QYBV         | Qalyub virus                     | KU925476                 | KU925477  | KU925478  |
| RAZAV        | Raza virus                       | KU925479                 | KU925480  | KU925481  |
| SAKV         | Sakhalin virus                   | KU925482                 | KU925483  | KU925484  |
| SAPV         | Sapphire II                      | KU925485                 | KU925486  | KU925487  |
| SOLV         | Soldado virus                    | KU925488                 | KU925489  | KU925490  |
| TTV1         | Tacheng tick virus I             | KM817683                 | KM817717  | KM817743  |
| TAGV         | Taggert virus                    | KU925491                 | KU925492  | KU925493  |
| TFAV         | Thiafora virus                   | KR537450                 | KR537451  | KR537452  |
| TILLV        | Tillamook virus                  | KU925494                 | KU925495  | KU925496  |
| TFLV         | Tofla virus                      | NC_029124                | NC_029123 | NC_029122 |
| TUNV         | Tunis virus                      | KU925497                 | KU925498  | KU925499  |
| WTV          | Wenzhou Tick virus               | KM817685                 | KM817718  | KM817745  |
| YOGV         | Yogue virus                      | KR537453                 | KR537454  | KR537455  |
| ZIRV         | Zirqa virus                      | KU925500                 | KU925501  | KU925502  |
| SSV1         | Shayang spider virus             | NC_031220                | NC_031218 | NC_031219 |
